# Supplementary material for: Elevated phosphorylation of EGFR in NSCLC due to mutations in PTPRH
Source: PubMed Central journal article supplement (PMC9477422; doi:10.1371/journal.pgen.1010362), 2022-09-02

Swiatnicki et al, Supplemental Figure 1

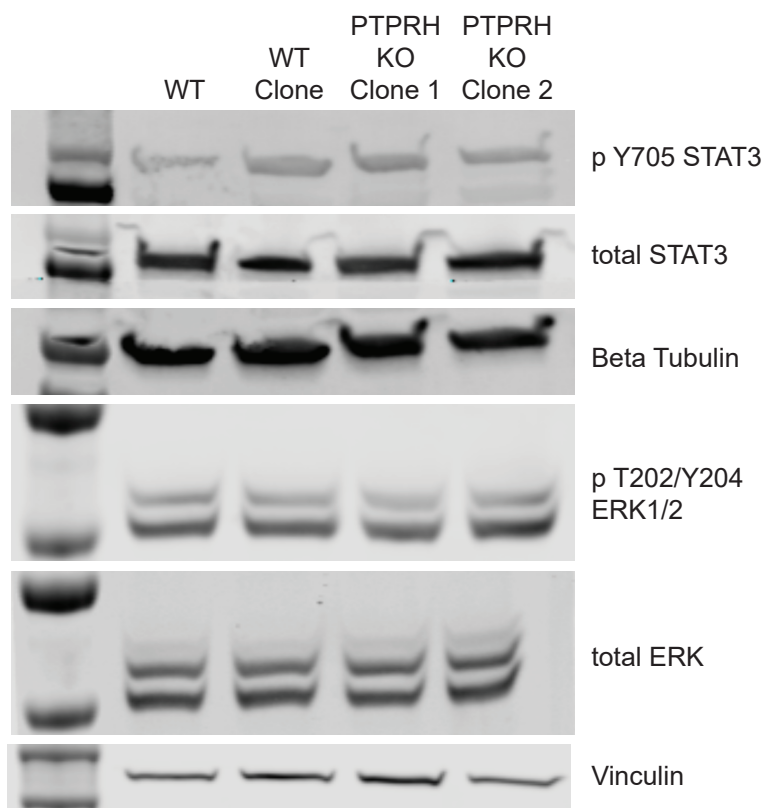

Supplement: pgen.1010362.s001.pdf [file pgen.1010362.s001.pdf]
